# Supplementary material for: LIF promotes tumorigenesis and metastasis of breast cancer through the AKT-mTOR pathway
Source: PubMed Central journal article supplement (PMC3996668; doi:10.18632/oncotarget.1772), 2014-02-11

## Supplementary materials

For

### **LIF promotes tumorigenesis and metastasis of breast cancer through the AKT-mTOR pathway**

#### **Figure legends**

**Supplementary Figure 1. The expression levels of LIFR and gp130 in a panel of breast cancer cells.** The mRNA expression levels of LIFR (a) and gp130 (b) were examined in a panel of breast cancer cells by using Taqman real-time PCR. The expression levels of LIFR and gp130 were normalized with actin. Data are presented as mean  $\pm$  SD (n=3).

**Supplementary Figure 2. Blocking AKT activity by the expression of DN-AKT largely abolishes the effect of LIF on the mTOR pathway *in vivo*.** The levels of total and phosphorylated AKT at Ser-473 (p-AKT), total and phosphorylated p70S6K at Thr-389 (p-p70S6K), total and phosphorylated 4EBP1 at Thr 37/46 (p-4EBP1) were determined in xenograft tumors formed by T47D cells with or without ectopic LIF expression and/or DN-AKT by Western-blot assays.

**Supplementary Figure 3. The activation of the mTOR pathway by LIF is independent of the STAT-3 signaling in breast cancer cells.** Exogenous LIF (100 ng/ml) activated the STAT-3 and mTOR pathways. Blocking STAT-3 activity had no significant effect on the activation of mTOR by LIF. Cells were treated with LIF along with or without static (3  $\mu$ M), a specific STAT-3 inhibitor, for the indicated

time periods. The levels of total and phosphorylated STAT-3 at Thy-705 (p-STAT-3), total and phosphorylated p70S6K at Thr-389 (p-p70S6K), total and phosphorylated 4EBP1 at Thr 37/46 (p-4EBP1) were determined by Western-blot assays.

# Supplementary Fig. 1

**a**

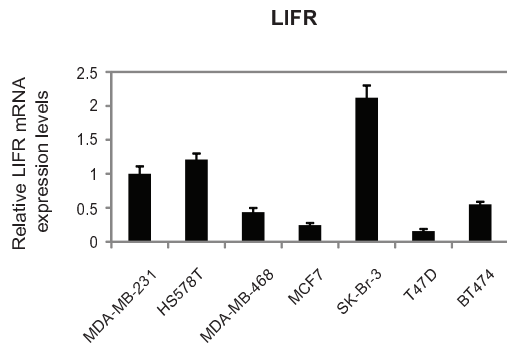

**b**

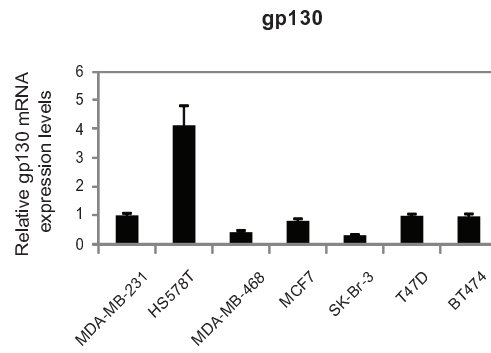

Supplementary Fig. 2

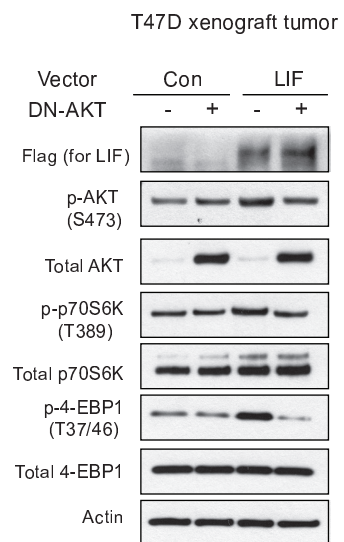

Supplement: oncotarget-05-788-s001.pdf [file oncotarget-05-788-s001.pdf]
